# Supplementary material for: Geriatric assessment in older patients with a hematologic malignancy: a systematic review
Source: PubMed Central journal article supplement — Haematologica. 2020 May 7;105(6):1484–93. doi: 10.3324/haematol.2019.245803 (PMC7271571; doi:10.3324/haematol.2019.245803), 2020-06
Supplement: 2019_245803-Disclosures_and_Contributions.pdf [file 2019_245803-Disclosures_and_Contributions.pdf]

Haematologica  
HAEMATOL/2019/245803  
Version 3  
Geriatric assessment in older patients with a haematological  
malignancy

Ellen R.M. Scheepers, Ariel M. Vondeling, Noortje Thielen, Rene' van  
der Griend, Reinhard Stauder, and Marije E. Hamaker

Disclosures: Parts of this work has been supported by Aart Huisman Foundation (ES) and  
Verein Senioren Krebshilfe (RS)

Contributions: ES: literature search, study design, data collection, data analysis, writing,  
figures AV: literature search, study design, data collection, data analysis, writing, approval  
of final document RG: writing, approval of final document NT: writing, approval of final  
document RS: writing, approval of final document MH: study design, writing, approval of  
final document.
