# Supplementary material for: Geriatric assessment in older patients with a hematologic malignancy: a systematic review
Source: PubMed Central journal article supplement — Haematologica. 2020 May 7;105(6):1484–93. doi: 10.3324/haematol.2019.245803 (PMC7271571; doi:10.3324/haematol.2019.245803), 2020-06
Supplement: HAEMATOL-2019-245803v3-Scheepers-01.pdf [file HAEMATOL-2019-245803v3-Scheepers-01.pdf]

# A systematic review on currently available data on the association between geriatric impairments and hematological malignancies

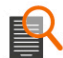

Literature research: 4629 citation (832 from MEDLINE; 3797 from EMBASE)

54 publications from 44 studies

- n=8 Acute myeloid leukemia and/or myelodysplastic syndromes
- n=2 Chronic lymphocytic leukemia
- n=13 Lymphoma
- n=7 Multiple myeloma
- n=15 Various hematological malignancies

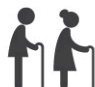

Patients with hematological malignancies, median age 73 (58-86) years

## Prevalence of geriatric impairments

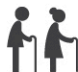

|                                               |              |
|-----------------------------------------------|--------------|
| • Polypharmacy                                | 51% (17-80%) |
| • Risk of malnutrition                        | 44% (27-82%) |
| • Activities of daily living (ADL) impairment | 18% (4-67%)  |
| • Instrumental IADL impairment                | 37% (3-85%)  |
| • Physical capacity                           | 27% (3-80%)  |
| • Symptoms of depression                      | 25% (10-94%) |
| • Cognitive impairment                        | 17% (0-44%)  |
| • Social support                              | 20% (7-54%)  |

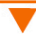

Patients with at least one geriatric impairment 51% (9-82%)

## Association between geriatric impairments and mortality

Univariate analysis

Multivariate analysis

|                                               | <u>Univariate analysis</u> | <u>Multivariate analysis</u> |
|-----------------------------------------------|----------------------------|------------------------------|
|                                               | No association             |                              |
| • Activities of daily living (ADL) impairment | 67%                        | 40%                          |
| • Instrumental IADL impairment                | 74%                        | 62%                          |
| • Physical capacity                           | 63%                        | 50%                          |
| • Cognitive impairment                        | 55%                        | 50%                          |

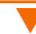

27/29 studies showed a significant association between at least one geriatric impairment and mortality
